# Supplementary figures and images for: Effect of Sample Sources on Heavy Metal Concentration Measured in Beta Vulgaris Organs
Source: Hindawi journal article supplement (doi:10.1155/2022/4968739), 2022-01-01

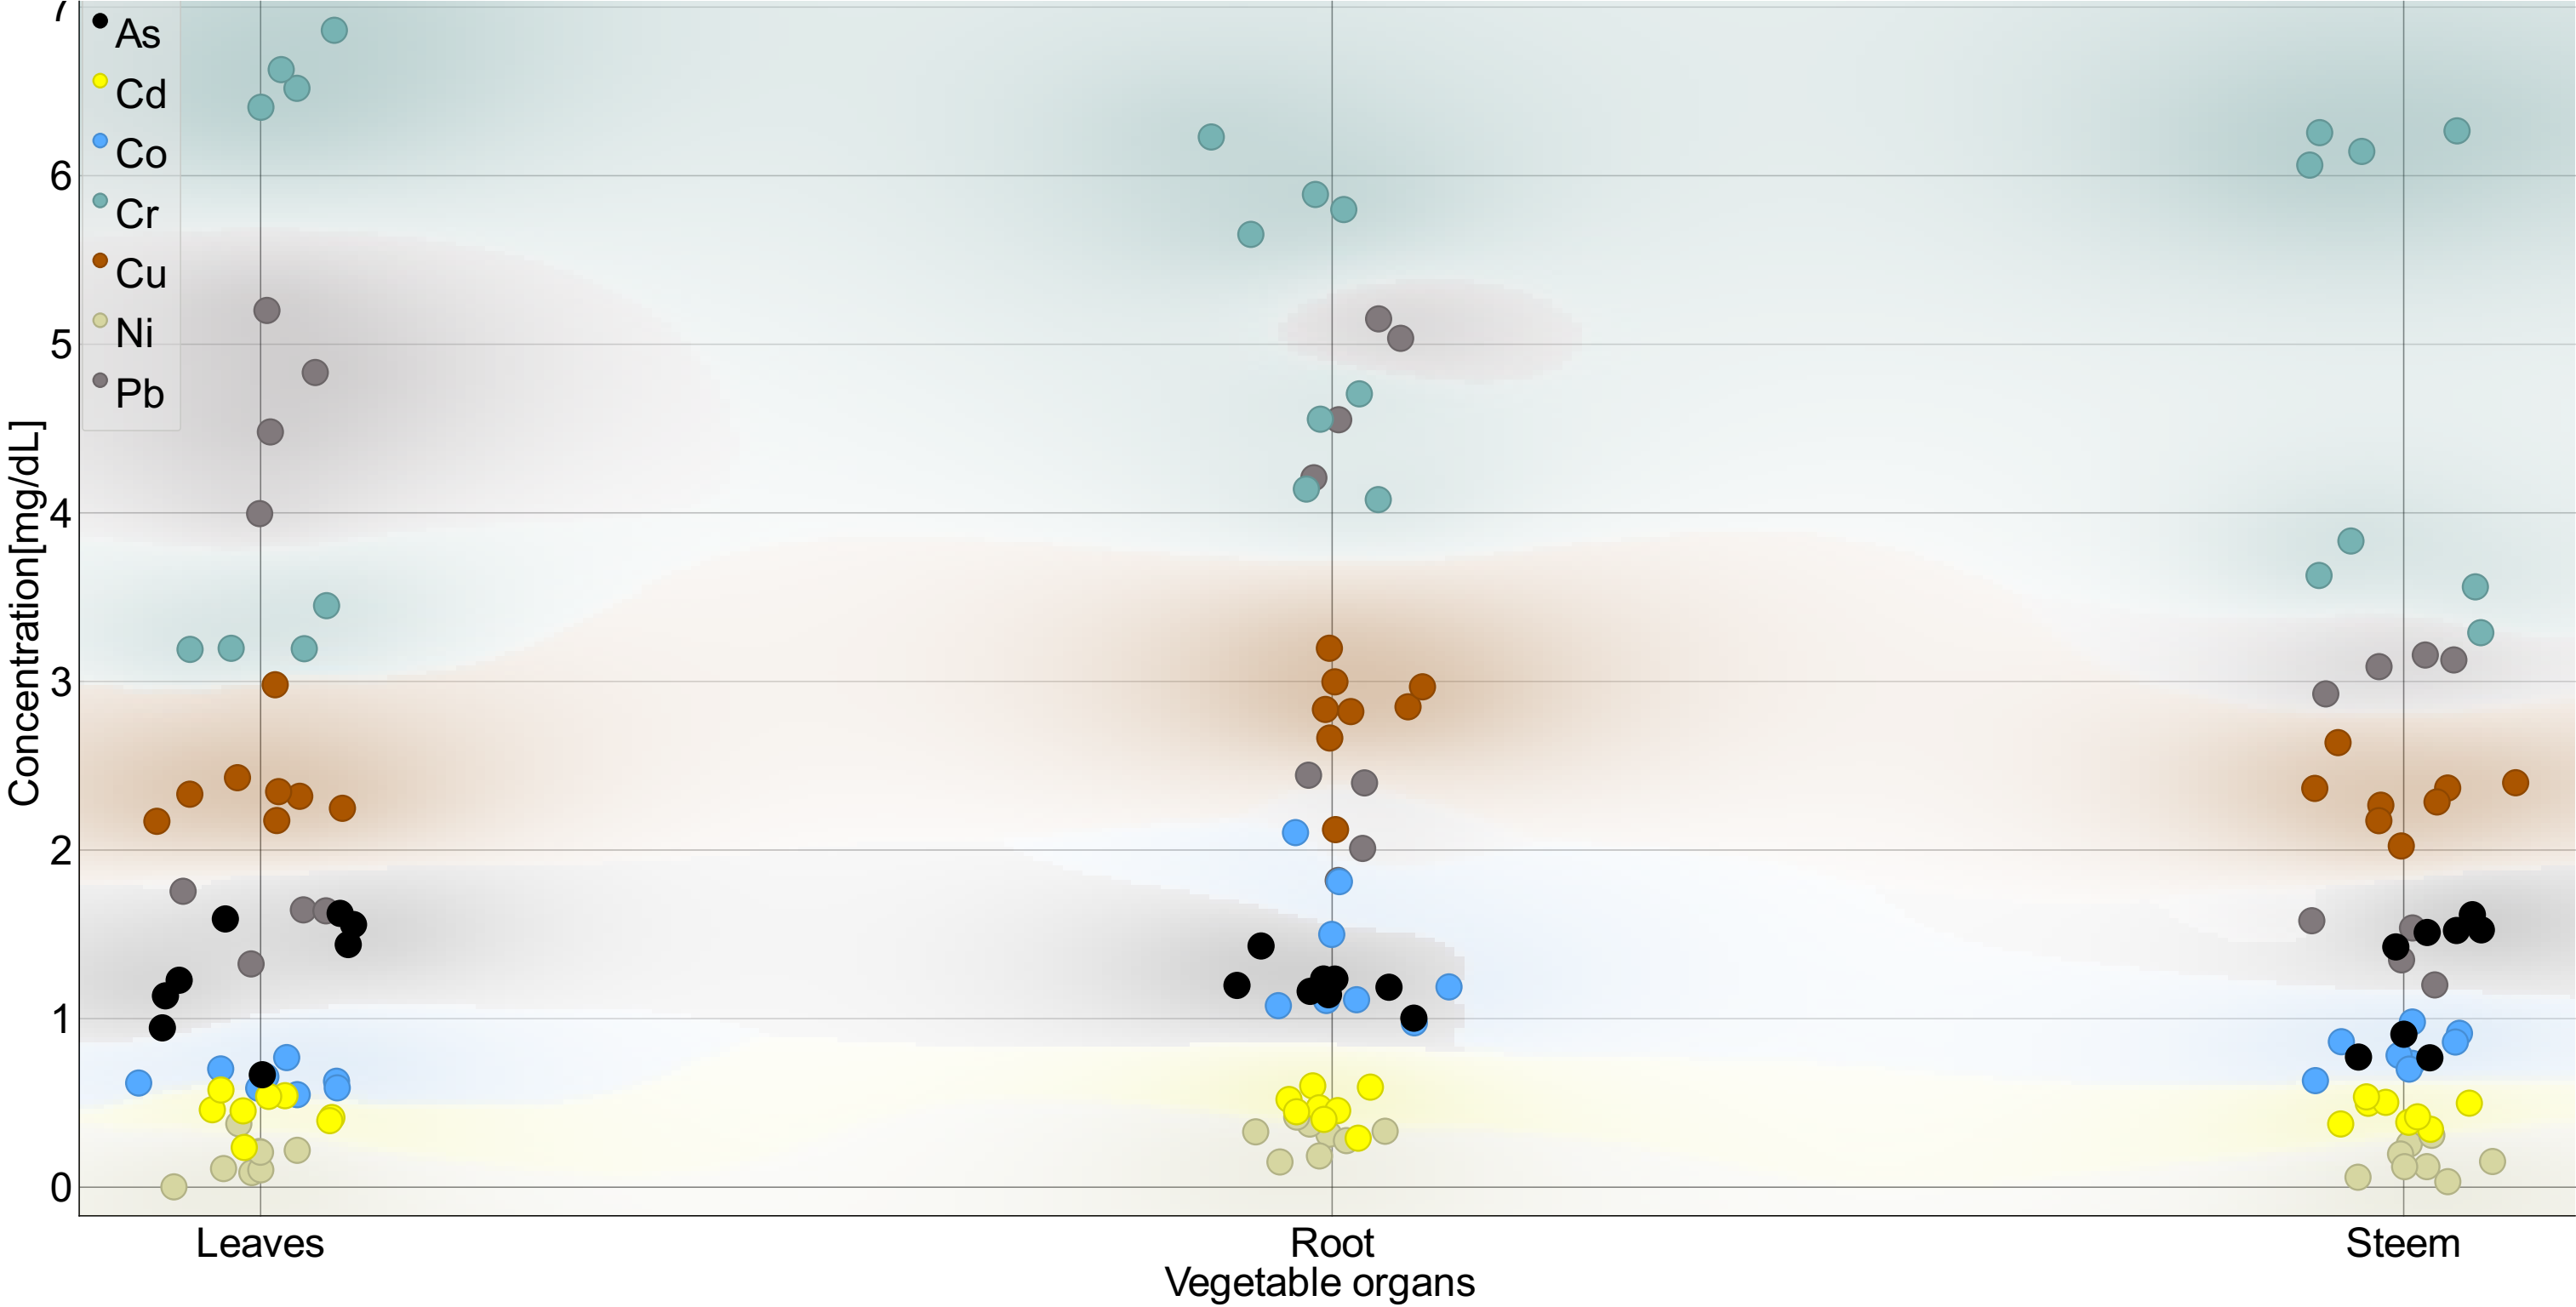

Supplement: f1 [file 4968739.f1.zip]
